# Supplementary material for: NANOG initiates epiblast fate through the coordination of pluripotency genes expression
Source: PubMed Central journal article supplement (PMC9213552; doi:10.1038/s41467-022-30858-8), 2022-06-21

## Epi/pluripotency marker expression

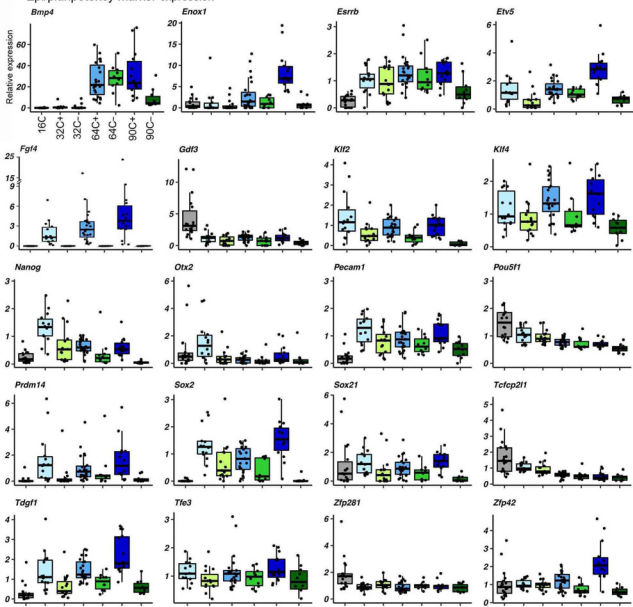

## PrE genes expression

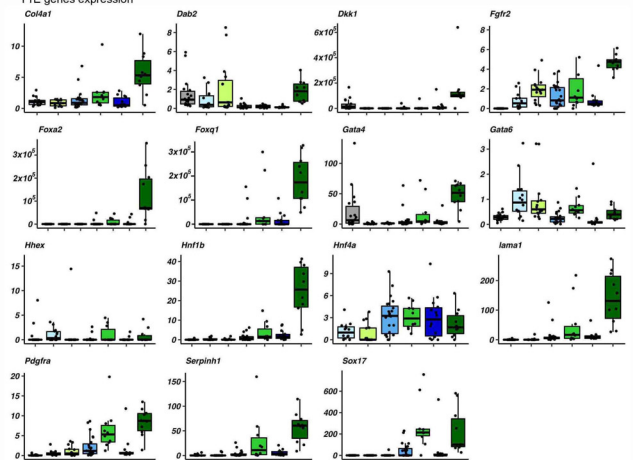

## FGF pathway genes expression

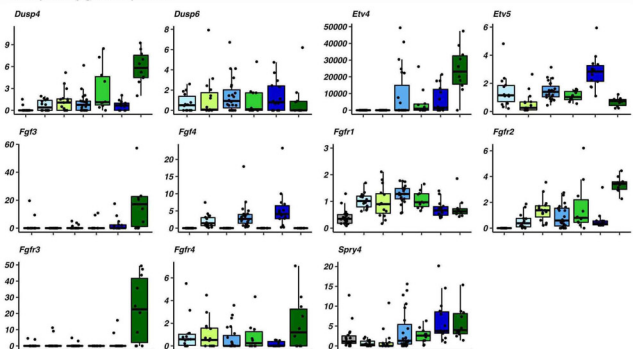

## Other genes expression

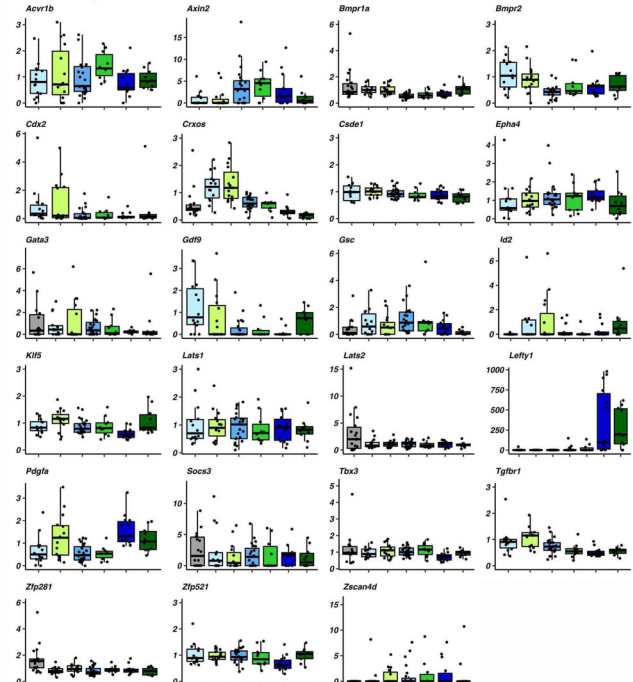

Supplement: 41467_2022_30858_MOESM5_ESM.pdf [file 41467_2022_30858_MOESM5_ESM.pdf]
