# Supplementary material for: NANOG initiates epiblast fate through the coordination of pluripotency genes expression
Source: PubMed Central journal article supplement (PMC9213552; doi:10.1038/s41467-022-30858-8), 2022-06-21

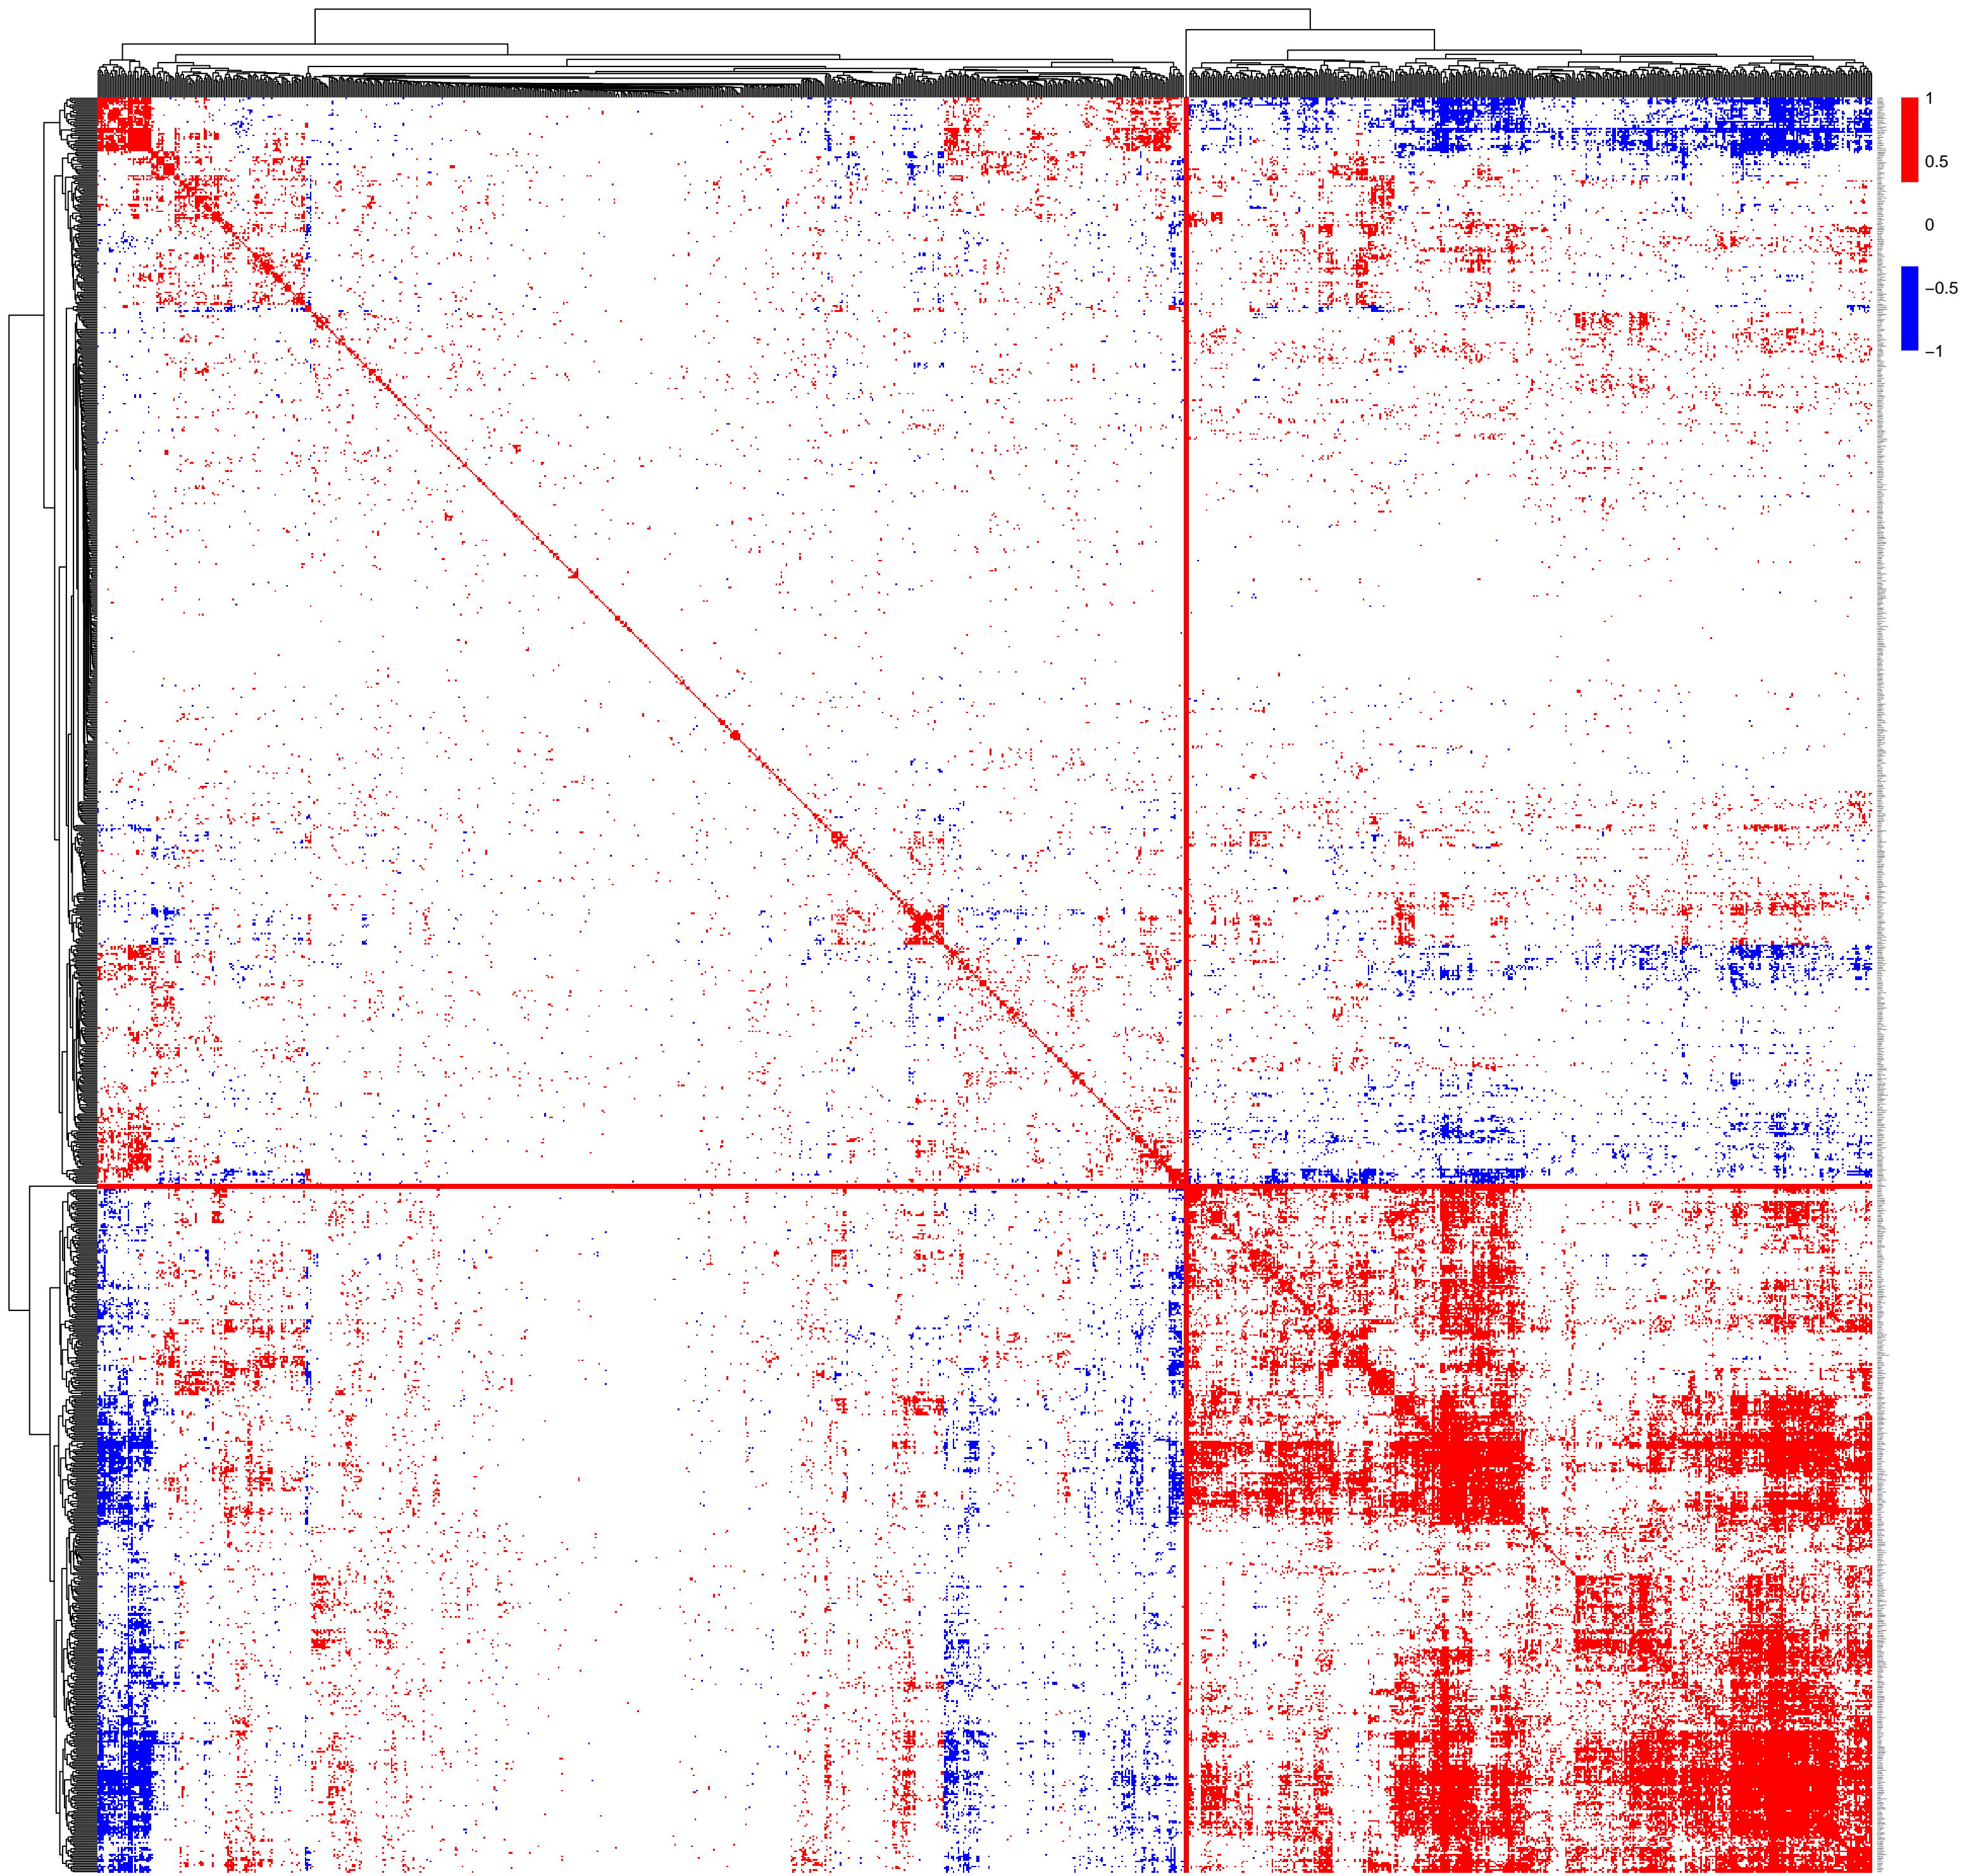

Supplement: 41467_2022_30858_MOESM15_ESM.pdf [file 41467_2022_30858_MOESM15_ESM.pdf]
